# Supplementary material for: Adherence to the Mediterranean Diet in College Students: Evaluation of Psychometric Properties of the KIDMED Questionnaire
Source: PubMed Central journal article supplement (PMC7766466; doi:10.3390/nu12123897), 2020-12-20
Supplement: nutrients-12-03897-s001.pdf [file nutrients-12-03897-s001.pdf]

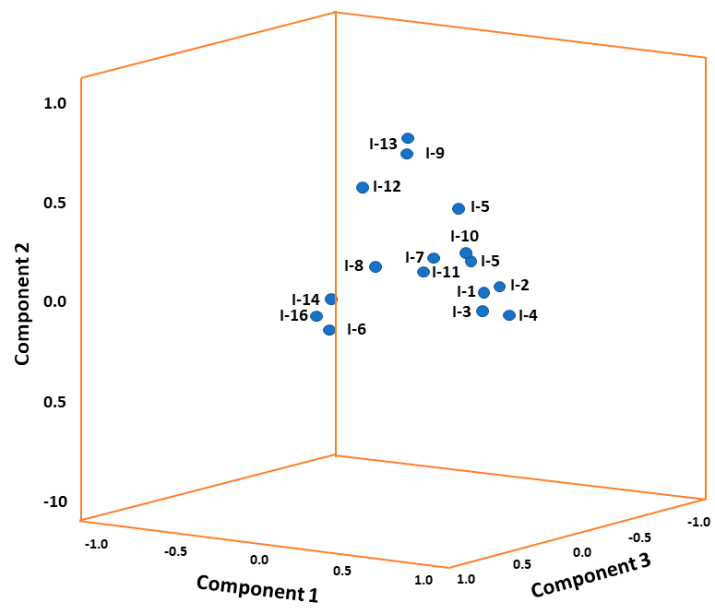

Figure S1. PCA analysis for KIDMED questionnaire.
